# Supplementary material for: Beijing’s central role in global artificial intelligence research
Source: PubMed Central journal article supplement (PMC9744801; doi:10.1038/s41598-022-25714-0), 2022-12-12
Supplement: 41598_2022_25714_MOESM1_ESM.pdf [file 41598_2022_25714_MOESM1_ESM.pdf]

# Supplementary Materials for Beijing’s Central Role in Global Artificial Intelligence Research

Bedoor AlShebli , Enshu Cheng , Marcin Waniek , Ramesh Jagannathan , Pablo Hernández-Lagos\*, and Talal Rahwan\*

\* Joint corresponding authors, ordered alphabetically: pablo.hernandezlagos@yu.edu; talal.rahwan@nyu.edu

## Supplementary Note 1: Actual and Expected Impact

In the context of AI research, cities differ in various ways. Beijing, for example, received over 42,000 citations in 2017, which is about twice as much as those received by Mountain View, California. However, in that year, Beijing produced five times as many papers as Mountain View. Thus, although Beijing was more impactful than Mountain View in absolute terms, one could argue that it was less impactful in relative terms, considering the differences in productivity between the two cities. In this section, we propose a benchmark for impact that accounts for productivity using standard techniques drawn from the field of international trade in economics.

The benchmark builds upon a model of expected impact based on the assumption of random citations. As described in the paper, if we denote by  $n$  the number of papers produced globally,  $n_i$  the number of papers produced by city  $i$ , and  $m_j$  the number of papers cited by city  $j$ , then the expected impact of  $i$  on  $j$  under the random citation baseline model is  $(n_i/n) \times m_j$ . This is the basic version of a frictionless gravity model widely studied in the international trade literature [1, 2, 3]. We follow a standard procedure from that literature to estimate the expected impact for each city pair in the sample. According to this procedure, the impact of city  $i$  on city  $j$ , which we label  $m_{ij}$ , is given by

$$m_{ij} = n^{-1} n_i^\alpha m_j^\beta \mu_{ij} \quad (1)$$

where  $\mu_{ij}$  is an error term statistically independent of  $n_i$  and  $m_j$  with  $E[\mu_{ij}|n_i, m_j] = 1$ , while  $\alpha$  and  $\beta$  capture the relative importance of the productivity of  $i$  and the number of papers cited by  $j$ , respectively. The expected impact, conditional on  $n_i$  and  $m_j$ , is equal to  $E[m_{ij}|n_i, m_j] = n^{-1} n_i^\alpha m_j^\beta$ . We estimate  $\alpha$  and  $\beta$  to determine the expected impact empirically. In particular, if  $\alpha = \beta = 1$  then the expected impact described by Equation (1) coincides with the random citation baseline model.

We estimate Equation (1) using standard techniques developed in the international trade literature. We follow the approach in [4] and compute the Poisson pseudo-maximum likelihood estimator (PPML) to calculate the expected impact. Poisson estimators are flexible enough to estimate Equation (1) directly, without the need to linearize it, thereby retaining city pairs for which the citation values are zero. Furthermore, Poisson estimators do not require the homoskedasticity assumption. Supplementary Table 1 presents the estimation of the exponents in Equation (1). Each column shows the results for a year between 2013 and 2017. As can be seen, although we reject the null hypothesis that  $\hat{\alpha} = 1$  at conventional levels in each specification, the estimated coefficients  $\hat{\alpha}$  and  $\hat{\beta}$  are very close to 1 across columns. In year 2017 for example, using  $N = 6,119,444$  city-pairs yields a coefficient  $\hat{\alpha} = 1.145$  (s.e. 0.029) and  $\hat{\beta} = 1.000$  (s.e. 0.017); a constant coefficient  $-12.509$  (s.e. 0.110), which implies a baseline citation between  $i$  and  $j$  of  $e^{-12.509} \approx 0$  and a pseudo- $R^2$  of 0.568. The precision with which the coefficients are estimated suggests that the random citation model provides a good approximation on average, but there may be other variables that might capture part of the unexplained variation. In any case, these empirical results align with the random citation model, albeit not perfectly.

We compute the difference between actual impact  $m_{ij}$  and expected impact  $\hat{m}_{ij} = n^{-1}n_i^{\hat{\alpha}}m_j^{\hat{\beta}}$  for each year from 2013 to 2017 using the estimates in Supplementary Table 1. In Figure 2b, as well Supplementary Figure 7, each cell corresponds to the sum of the difference  $(m_{ij} - \hat{m}_{ij})$  for each city-pair  $(i, j)$  across the five years from 2013 to 2017. Intuitively, this represents the difference between actual and expected impact during those five years.

Supplementary Table 1: Estimation of expected impact.

|                                   | (1)                   | (2)                   | (3)                   | (4)                   | (5)                   |
|-----------------------------------|-----------------------|-----------------------|-----------------------|-----------------------|-----------------------|
| Year                              | 2013                  | 2014                  | 2015                  | 2016                  | 2017                  |
| Productivity ( $\alpha$ )         | 1.054***<br>(0.031)   | 1.080***<br>(0.024)   | 1.117***<br>(0.024)   | 1.148***<br>(0.028)   | 1.145***<br>(0.029)   |
| Total citations ( $\beta$ )       | 1.000***<br>(0.018)   | 1.000***<br>(0.021)   | 1.000***<br>(0.019)   | 1.000***<br>(0.019)   | 1.000***<br>(0.017)   |
| Constant                          | -11.973***<br>(0.108) | -12.141***<br>(0.083) | -12.344***<br>(0.105) | -12.511***<br>(0.106) | -12.509***<br>(0.110) |
| N                                 | 5,692,960             | 5,925,577             | 6,035,508             | 6,202,547             | 6,119,444             |
| pseudo- $R^2$                     | 0.297                 | 0.409                 | 0.434                 | 0.501                 | 0.568                 |
| Ho: coeff. of $n_i = 1$ , p-val:  | 0.078                 | 0.001                 | <0.001                | <0.001                | <0.001                |
| Ho: coeff. of $m_j = 1$ , p-val.: | 0.999                 | 0.999                 | 0.999                 | 0.999                 | 0.999                 |

The table shows the estimation of the Poisson Pseudo-Maximum Likelihood estimation of the gravity model of citations estimated each year separately. The last two rows show the p-values associated with a one degree-of-freedom chi-squared test where the null hypothesis is the corresponding coefficient being equal to 1. Standard errors are in parentheses to the right of each coefficient. Stars denote significance at conventional levels (\* p-value<0.05, \*\* p-value<0.01, \*\*\* p-value<0.001)

## Supplementary Note 2: Gravity model of citations with frictions

The model in Equation (1) represents a world without frictions. Frictions can be readily incorporated into the model ([5] p. 17). Commonly used proxies for frictions are: distance, country’s contiguity, common language, whether English is the official language of country, previous colonial ties and remoteness (weighted average distance of a city to the world, weighted by number of AI scientists). After including frictions, the model in Equation (1) becomes:

$$m_{ij} = n^{-1} n_j^\alpha m_i^\beta F_{ij} \mu_{ij} \quad (2)$$

where the additional factor,  $F_{ij} = \prod_k (f_{ij}^k)^{\theta_k}$ , is a function of the frictions defined. The goal is to estimate  $\alpha$ ,  $\beta$  and the set of parameters  $\theta_k$ . The error term  $\mu_{ij}$  makes the relationship hold with equality and follows the same distributional assumptions described in the previous section. Note that Equation (1) is a particular case of Equation (2) when  $\theta_k = 0$  for all  $k$ .

We follow [4] and estimate Equation (2) using a Pseudo-Maximum Likelihood (PML) estimator that accounts for zero citations. We divide the additional variables in three groups. The first group comprises total scientists at source and at destination. The second group consists of a series of indicator variables that account for distance, including the same-city indicator. We compute geodesic distance between two cities using their coordinates, downloaded from the Google Geocoding API. The last group includes cultural and geographic variables. We use the CEPII variables [6] widely utilized in the trade literature. These variables are indicators of whether two city’s countries: are contiguous, share official common language, shared common language is English, ever had a colonial relationship, colonial relationship extends after 1945, and share a common colonizer. We include two additional geographic variables that measure remoteness of both source and destination. Remoteness is simply the weighted average of the distance to all other cities in the world, with weights being the share of AI scientists of those cities over the total number of AI scientists in the world. Supplementary Table 2 shows the Poisson PML estimates using different specifications. Impact is positively and significantly associated with productivity, regardless of the model and specification. Column (1) shows the basic frictionless model estimation for clarity. This result coincides with column (5) in Supplementary Table 1. Each of the remaining columns adds frictions as controls sequentially. Column (2) includes number of AI scientists. The coefficients accompanying both, productivity and destination total citations, remain qualitatively the same as in the frictionless model (1). However, the estimates for the parameters of both source and destination’s total AI scientists are small in magnitude with relatively large standard errors. Column (3) adds distance. Again, the parameters accompanying productivity and destination total citations remain about the same and precisely estimated. Regarding distance, we observe evidence of home-bias in that citations are positively associated with being in the same city. But closeness also seems to matter. Cities within a radius of about 6,000 km are associated with additional citations. The last column adds geographic and cultural controls. The coefficients in the frictionless model remain very close to one, although we reject equality at conventional levels. Regarding controls, same country and common language are the ones that stand out as positive. Colonial ties after 1945, however,

are negatively associated with citations. Remoteness of the source city, that is, how far the city is relative to all other cities, is positively associated. This may indicate that some small centers such as Redmond in Washington State, U.S. elicit a large number of citations.

The main conclusion from the gravity model with frictions is the robustness of the frictionless model. That is, size of the source in terms of productivity and of the destination in terms of total citations made, provide fairly good explanations of the expected number of citations a city receives through a frictionless gravity model. Nevertheless, frictions explain some of the unaccounted variance. Geographic and cultural closeness, for example, are also positively associated with impact.

Supplementary Table 2: Gravity model: citations

| Dependent variable:                       | Citations to source city $j$ 's papers from city $i$ (Impact of $j$ on $i$ ) |         |            |         |            |         |            |         |
|-------------------------------------------|------------------------------------------------------------------------------|---------|------------|---------|------------|---------|------------|---------|
|                                           | (1)                                                                          |         | (2)        |         | (3)        |         | (4)        |         |
| Source's productivity ( $n_j$ )           | 1.145***                                                                     | (0.029) | 1.340***   | (0.085) | 1.324***   | (0.085) | 1.250***   | (0.081) |
| Total papers cited by city $i$ ( $m_i$ )  | 1.000***                                                                     | (0.017) | 1.002***   | (0.037) | 0.951***   | (0.028) | 0.894***   | (0.024) |
| <i>Number of AI scientists:</i>           |                                                                              |         |            |         |            |         |            |         |
| Total scientists at source city $j$       |                                                                              |         | -0.179*    | (0.071) | -0.282***  | (0.069) | -0.210**   | (0.066) |
| Total AI scientists at city $i$           |                                                                              |         | -0.001     | (0.041) | -0.047*    | (0.023) | -0.002     | (0.016) |
| <i>Distance:</i>                          |                                                                              |         |            |         |            |         |            |         |
| Same city                                 |                                                                              |         |            |         | 3.592***   | (0.283) | 3.047***   | (0.249) |
| Distance; 2000km                          |                                                                              |         |            |         | 0.786***   | (0.073) | 0.587***   | (0.072) |
| 4000km                                    |                                                                              |         |            |         | 0.393***   | (0.093) | 0.402***   | (0.102) |
| 6000km                                    |                                                                              |         |            |         | 0.217**    | (0.083) | 0.435***   | (0.104) |
| 8000km                                    |                                                                              |         |            |         | 0.029      | (0.059) | 0.363***   | (0.071) |
| 10000km                                   |                                                                              |         |            |         | 0.214*     | (0.093) | 0.573***   | (0.118) |
| 12000km                                   |                                                                              |         |            |         | 0.257**    | (0.082) | 0.542***   | (0.096) |
| 14000km                                   |                                                                              |         |            |         | 0.123      | (0.081) | 0.262***   | (0.079) |
| 16000km                                   |                                                                              |         |            |         | 0.006      | (0.071) | 0.037      | (0.072) |
| <i>Cultural and geographic variables:</i> |                                                                              |         |            |         |            |         |            |         |
| Same country                              |                                                                              |         |            |         |            |         | 1.062***   | (0.070) |
| Contiguous country                        |                                                                              |         |            |         |            |         | 0.142      | (0.077) |
| Official common language                  |                                                                              |         |            |         |            |         | 0.448***   | (0.116) |
| Official common language as English       |                                                                              |         |            |         |            |         | -0.152     | (0.081) |
| Colonial relationship                     |                                                                              |         |            |         |            |         | 0.059      | (0.088) |
| Colonial relationship after 1945          |                                                                              |         |            |         |            |         | -0.316***  | (0.094) |
| Common colonizer after 1945               |                                                                              |         |            |         |            |         | 0.297**    | (0.104) |
| Remoteness of source $j$                  |                                                                              |         |            |         |            |         | 0.185***   | (0.034) |
| Remoteness of destination $i$             |                                                                              |         |            |         |            |         | -0.001     | (0.019) |
| Constant                                  | -12.509***                                                                   | (0.110) | -12.814*** | (0.224) | -12.173*** | (0.306) | -13.014*** | (0.315) |
| N                                         | 6119444                                                                      |         | 3084448    |         | 3084448    |         | 3063400    |         |
| pseudo R-sq.                              | 0.568                                                                        |         | 0.559      |         | 0.630      |         | 0.654      |         |
| Ho: coefficient $n_i = 1$ p-val.          | <0.001                                                                       |         | <0.001     |         | <0.001     |         | 0.002      |         |
| Ho: coefficient $m_j = 1$ p-val.          | 0.99                                                                         |         | 0.95       |         | 0.08       |         | <0.001     |         |

The table shows the estimation of the Poisson Pseudo-Maximum Likelihood estimation of the gravity model of citations. Column (1) shows the point estimates of the baseline frictionless model as benchmark. The remaining columns represent models with frictions as controls added sequentially. The number of observations decreases after including controls because of missing observations on the number of scientists, and cultural-geographic variables. The last two rows show the p-values associated with a one degree-of-freedom chi-squared test where the null hypothesis is the corresponding coefficient being equal to 1. Standard errors are in parentheses to the right of each coefficient. Stars denote significance at conventional levels (\* p-value<0.05, \*\* p-value<0.01, \*\*\* p-value<0.001)

### Supplementary Note 3: Gravity model of migration with frictions

Drawing on the previous analysis and the rich literature on gravity models, we can also estimate a model of migration that accounts for size and frictions. Equation 2 can be relabeled to explain migration of AI scientists from one city to another. Now, let  $m_{ij}$  denote migration from city  $j$  to city  $i$ ,  $n_i$  AI scientists supplied to  $i$  from all origins,  $m_j$  total AI scientists in  $j$ , and  $n$  total AI scientists in the world. Using  $n_i$  allows us to account for whether migration decisions are associated with the number of scientists at destination. Such decisions might be motivated by agglomeration economies or knowledge spillovers at destination that may enhance the migrant scientist's productivity. The inclusion of  $m_j$  accounts for the rather mechanical effect that larger cities should source more scientists to the rest of the world. The migration model is a straightforward relabelling of the citation model above. But note that the number of pairwise observations for scientist migration is smaller than for citations. That is due to the fact that one scientist can write a large number of papers but migrate very few times. Another clarification is that we use productivity of  $i$  and total citations made by  $j$  as controls to account for production size frictions. Finally, we measure migration in five-year intervals as people's mobility is slower than knowledge diffusion. Thus, we focus on the period 2015 to 2019.

Supplementary Table 3 shows the results of the estimation. Column (1) features the frictionless model. Total AI scientists supplied to  $i$  is positively associated with migration to city  $i$ , although the value is far from 1. AI labor size at source also seems to matter but the coefficient is estimated less precisely. When adding productivity and impact controls in column (2) the coefficient on total AI scientists supplied to city  $i$  doubles and remains significant at conventional levels. However, adding the productivity and impact controls does little to the correlation between AI labor at source and migration. Column (3) and (4) add distance and geographic-cultural controls sequentially. In both specifications, the coefficients on AI labor supplied to city  $i$  and AI labor in city  $j$  are positive (about 0.5) and precisely estimated. These results suggest that AI scientists migrate more frequently to cities that attract other AI scientists from all over the world. They also suggest that the number of AI scientist in a city is associated with higher chances of finding an AI scientist from that city everywhere else. The fact that frictions make the coefficient on AI labor larger and more precise suggest that frictions matter for migration, perhaps more than for citations.

Supplementary Table 3: Gravity model: Migration

| Dependent variable:                             | AI Scientists' migration to destination city $i$ from city $j$ (Migration from $j$ to $i$ ) |         |           |         |           |         |           |         |
|-------------------------------------------------|---------------------------------------------------------------------------------------------|---------|-----------|---------|-----------|---------|-----------|---------|
|                                                 | (1)                                                                                         |         | (2)       |         | (3)       |         | (4)       |         |
| AI scientists supplied to $i$ from all origins  | 0.238***                                                                                    | (0.031) | 0.506***  | (0.057) | 0.603***  | (0.025) | 0.566***  | (0.026) |
| Total AI scientists at city $j$                 | 0.217**                                                                                     | (0.076) | 0.231*    | (0.091) | 0.448***  | (0.035) | 0.450***  | (0.031) |
| <i>Productivity and citations:</i>              |                                                                                             |         |           |         |           |         |           |         |
| Destination's productivity                      |                                                                                             |         | 0.427***  | (0.127) | -0.008    | (0.027) | 0.017     | (0.028) |
| Total papers cited by city $j$                  |                                                                                             |         | -0.620*** | (0.083) | -0.106*** | (0.021) | -0.095*** | (0.022) |
| <i>Distance:</i>                                |                                                                                             |         |           |         |           |         |           |         |
| Same city                                       |                                                                                             |         |           |         | 3.723***  | (0.146) | 4.033***  | (0.184) |
| Distance; 2000km                                |                                                                                             |         |           |         | 0.067     | (0.137) | 0.121     | (0.135) |
| 4000km                                          |                                                                                             |         |           |         | -0.104    | (0.130) | -0.271*   | (0.131) |
| 6000km                                          |                                                                                             |         |           |         | 0.304     | (0.171) | 0.144     | (0.148) |
| 8000km                                          |                                                                                             |         |           |         | -0.074    | (0.133) | -0.046    | (0.129) |
| 10000km                                         |                                                                                             |         |           |         | -0.202    | (0.124) | -0.136    | (0.124) |
| 12000km                                         |                                                                                             |         |           |         | 0.169     | (0.172) | 0.236     | (0.170) |
| 14000km                                         |                                                                                             |         |           |         | -0.295    | (0.164) | -0.279    | (0.150) |
| 16000km                                         |                                                                                             |         |           |         | 0.064     | (0.178) | 0.061     | (0.177) |
| <i>Cultural and geographic variables:</i>       |                                                                                             |         |           |         |           |         |           |         |
| Same country                                    |                                                                                             |         |           |         |           |         | -0.228*   | (0.102) |
| Contiguous country                              |                                                                                             |         |           |         |           |         | 0.223     | (0.130) |
| Official common language                        |                                                                                             |         |           |         |           |         | 0.361***  | (0.089) |
| Official common language as English             |                                                                                             |         |           |         |           |         | -0.131*** | (0.032) |
| Colonial relationship                           |                                                                                             |         |           |         |           |         | 0.242*    | (0.113) |
| Colonial relationship after 1945                |                                                                                             |         |           |         |           |         | 0.109     | (0.207) |
| Common colonizer after 1945                     |                                                                                             |         |           |         |           |         | 0.715***  | (0.194) |
| Remoteness of source                            |                                                                                             |         |           |         |           |         | -0.041*   | (0.017) |
| Remoteness of destination                       |                                                                                             |         |           |         |           |         | -0.051    | (0.029) |
| Constant                                        | -0.696                                                                                      | (0.452) | -0.090    | (0.666) | -3.735*** | (0.213) | -3.855*** | (0.202) |
| N                                               | 8306                                                                                        |         | 4146      |         | 4146      |         | 4139      |         |
| pseudo R-sq                                     | 0.022                                                                                       |         | 0.033     |         | 0.972     |         | 0.979     |         |
| Ho: coefficient AI scientists at $i = 1$ p-val. | <0.001                                                                                      |         | <0.001    |         | <0.001    |         | <0.001    |         |
| Ho: coefficient AI scientists at $j = 1$ p-val. | <0.001                                                                                      |         | <0.001    |         | <0.001    |         | <0.001    |         |

The table shows the estimation of the Poisson Pseudo-Maximum Likelihood estimation of the gravity model of migrations. Column (1) shows the point estimates of the baseline frictionless model as benchmark. The remaining columns represent models with frictions as controls added sequentially. The last two rows show the p-values associated with a one degree-of-freedom chi-squared test where the null hypothesis is the corresponding coefficient being equal to 1. Standard errors are in parentheses to the right of each coefficient. Stars denote significance at conventional levels (\* p-value<0.05, \*\* p-value<0.01, \*\*\* p-value<0.001)



## Supplementary Note 4: Alternative network science measures

In this section, we quantify the importance of each city in the citation network, the collaboration network, and the migration network using various measures borrowed from the social network analysis toolkit. To this end, for any given node  $v_i \in V$ , let  $P(v_i)$  denote the set of all predecessors of  $v_i$  (i.e., all nodes that have edges to  $v_i$ ), let  $S(v_i)$  denote the set of all successors of  $v_i$  (i.e., all nodes with edges from  $v_i$ ), let  $w_{ij}$  denote the weight of the edge from  $v_i$  to  $v_j$ , and let  $d_{ij}$  denote the distance between  $v_i$  and  $v_j$  (i.e., the sum of weight reciprocals along the shortest path between the two nodes). With this notation in place, we are ready to formally define three centrality measure:

- Degree centrality [7]—the importance of a node  $v_i$  is determined based on the weights of the edges incident with  $v_i$ . That is:

$$c_{degr}(v_i) = \sum_{v_j \in P(v_i)} w_{ji} + \sum_{v_j \in S(v_i)} w_{ij}$$

- Closeness centrality [8]—the importance of a node  $v_i$  is determined based on the distance from  $v_i$  to all other nodes (if there is no path from  $v_i$  to  $v_j$  we assume  $d_{ij} = \infty$ ). More formally:

$$c_{clos}(v_i) = \sum_{v_j \in C \setminus \{v_i\}} \frac{1}{d_{ij}}$$

- PageRank centrality [9]—the importance of a node  $v_i$  is determined based on the importance of its neighbors. The PageRank centrality is computed by an iterative process, where the centrality of each node  $v_i$  in the first round is  $c_{page}^1(v_i) = \frac{1}{|V|}$ . In a subsequent round,  $t$ , the centrality of node  $v_i$  is computed as:

$$c_{page}^t(v_i) = \frac{1 - \gamma}{|V|} + \gamma \sum_{v_j \in P(v_i)} \frac{w_{ji}}{\sum_{v_k \in S(v_j)} w_{jk}} c_{page}^{t-1}(v_j)$$

where  $\gamma = 0.85$  is the damping factor. We continue the computation until one of the following two conditions is satisfied: (1) the computation lasts for 1,000,000 iterations; (2) the difference in the centrality sum of all nodes between does not exceed  $10^{-5}$  for 1,000 consecutive iterations.

In additional to the above three centrality measures, we also consider two alternative influence measures. Both measures are based on the idea that influence may propagate through a network by “node activation”. The basic idea is as that when a certain node is sufficiently influenced by its neighbours, it becomes “active”, in which case it starts influencing its “inactive” neighbours. To initiate this influence propagation process, one of the nodes, called *the seed node*, is activated from the start. Assuming that time is discrete, we denote by  $I_t \subseteq V$  the set of nodes that are active at round  $t$ , implying that  $I_1$  is the set consisting of the seed node. The way influence propagates to inactive nodes depends on the influence model under consideration. In this context, two widely-used models are:

- Independent cascade [10]—in every round  $t > 1$ , every node  $v_i \in V$  that became active in round  $t - 1$  activates every inactive successor,  $v_j \in S(v_i) \setminus I_{t-1}$ , with probability:

$$p_{ij} = \frac{qw_{ij}}{w^*},$$

where  $q = 0.25$  is the basic activation probability, and  $w^*$  is the maximal edge weight in the network. The process ends when there are no newly active nodes, i.e., when  $I_t = I_{t-1}$ .

- Linear threshold [11]—every node  $v_i \in V$  is assigned a *threshold value*  $\theta_i$  which is uniformly sampled from the  $[0, 1]$  interval. Then, in every round  $t > 1$ , every inactive node  $v_i$  becomes active, i.e., becomes a member of  $I_t$ , if the total weight of edges from their active predecessors divided by the total weight of all incoming edges meets or exceeds the threshold, i.e., if:

$$\frac{\sum_{v_j \in P(v_i) \cap I_{t-1}} w_{ji}}{\sum_{v_j \in P(v_i)} w_{ji}} \geq \theta_i$$

The process ends when there are no newly active nodes, i.e., when  $I_t = I_{t-1}$ .

In either model, the influence of a node  $v_i$  is defined as the expected number of active nodes when starting with  $v_i$  as the seed node.

Our results are presented in Tables 4 to 8. As can be seen, regardless of the network under consideration (be it the citation, the collaboration, or the migration network) and regardless of the measure used (be it degree, closeness, PageRank, independent cascade-based influence, or linear threshold-based influence) Beijing is the highest ranked city worldwide.

Supplementary Table 4: City ranking according to **degree centrality** in the citation, migration, and collaboration networks. The color indicates whether the city is east (red) or west (blue).

| Citation network  |         | Migration network |       | Collaboration network |        |
|-------------------|---------|-------------------|-------|-----------------------|--------|
| 1) Beijing        | 396.525 | 1) Beijing        | 3.298 | 1) Beijing            | 71.576 |
| 2) Hong Kong      | 141.379 | 2) Hong Kong      | 2.389 | 2) Hong Kong          | 26.747 |
| 3) Shanghai       | 112.869 | 3) Singapore      | 1.768 | 3) Shanghai           | 22.040 |
| 4) Wuhan          | 110.955 | 4) Shanghai       | 1.146 | 4) Singapore          | 20.823 |
| 5) Singapore      | 108.419 | 5) Wuhan          | 1.056 | 5) Wuhan              | 20.652 |
| 6) Nanjing        | 107.980 | 6) Nanjing        | 1.045 | 6) Cambridge          | 19.697 |
| 7) Redmond        | 106.242 | 7) Sydney         | 0.924 | 7) London             | 19.672 |
| 8) London         | 91.788  | 8) Shenzhen       | 0.808 | 8) Nanjing            | 19.465 |
| 9) Xi'an          | 91.212  | 9) Xi'an          | 0.732 | 9) Sydney             | 17.162 |
| 10) Mountain View | 87.662  | 10) Munich        | 0.662 | 10) New York          | 15.131 |
| 11) Munich        | 82.449  | 11) Pittsburgh    | 0.601 | 11) Xi'an             | 13.455 |
| 12) Stanford      | 78.247  | 12) Hangzhou      | 0.596 | 12) Hangzhou          | 12.465 |
| 13) Pittsburgh    | 77.227  | 13) Harbin        | 0.561 | 13) Pittsburgh        | 12.323 |
| 14) Seoul         | 74.561  | 14) Redmond       | 0.535 | 14) Munich            | 11.854 |
| 15) Berkeley      | 72.934  | 15) Hefei         | 0.515 | 15) Redmond           | 11.586 |
| 16) Cambridge     | 72.545  | 16) Taipei        | 0.505 | 16) Boston            | 11.197 |
| 17) Chengdu       | 60.808  | 17) Cambridge     | 0.500 | 17) Chengdu           | 11.091 |
| 18) Hangzhou      | 60.071  | 18) Boston        | 0.495 | 18) Paris             | 10.475 |
| 19) Sydney        | 59.025  | 19) Chapel Hill   | 0.470 | 19) Melbourne         | 10.268 |
| 20) Paris         | 56.672  | 20) Paris         | 0.465 | 20) Los Angeles       | 10.268 |
| 21) Oxford        | 56.323  | 21) London        | 0.465 | 21) Guangzhou         | 10.071 |
| 22) New York      | 54.798  | 22) Seoul         | 0.465 | 22) Hefei             | 9.288  |
| 23) Changsha      | 51.955  | 23) Guangzhou     | 0.465 | 23) Stanford          | 8.576  |
| 24) Harbin        | 50.500  | 24) Tokyo         | 0.455 | 24) Shenzhen          | 8.535  |
| 25) Los Angeles   | 48.561  | 25) Zurich        | 0.434 | 25) Seoul             | 8.333  |
| 26) Toronto       | 48.177  | 26) Chengdu       | 0.404 | 26) Harbin            | 8.318  |
| 27) Hefei         | 47.162  | 27) Melbourne     | 0.379 | 27) Philadelphia      | 7.722  |
| 28) Boston        | 45.586  | 28) New York      | 0.348 | 28) Changsha          | 7.444  |
| 29) Tokyo         | 43.773  | 29) Seattle       | 0.348 | 29) Mountain View     | 7.071  |
| 30) Zurich        | 42.747  | 30) Washington    | 0.343 | 30) Tianjin           | 7.000  |
| 31) Seattle       | 40.293  | 31) Philadelphia  | 0.338 | 31) Seattle           | 6.990  |
| 32) Guangzhou     | 39.187  | 32) Canberra      | 0.333 | 32) Berkeley          | 6.596  |
| 33) Tehran        | 38.828  | 33) Toronto       | 0.318 | 33) Toronto           | 6.566  |
| 34) Montreal      | 38.505  | 34) Tianjin       | 0.318 | 34) Brisbane          | 6.460  |
| 35) Tianjin       | 37.965  | 35) Stanford      | 0.308 | 35) Washington        | 6.111  |
| 36) Dalian        | 35.677  | 36) Dalian        | 0.303 | 36) Canberra          | 5.970  |
| 37) Chongqing     | 33.187  | 37) Armonk        | 0.293 | 37) Baltimore         | 5.687  |
| 38) Menlo Park    | 31.242  | 38) Los Angeles   | 0.293 | 38) Montreal          | 5.672  |
| 39) Taipei        | 30.278  | 39) Ann Arbor     | 0.273 | 39) Tokyo             | 5.520  |
| 40) Forest Home   | 28.763  | 40) Tehran        | 0.268 | 40) Urbana            | 5.237  |

Supplementary Table 5: City ranking according to **closeness centrality** in the citation, migration, and collaboration networks. The color indicates whether the city is east (red) or west (blue).

| Citation network |               |         | Migration network |             |       | Collaboration network |               |        |
|------------------|---------------|---------|-------------------|-------------|-------|-----------------------|---------------|--------|
| 1)               | Beijing       | 297.676 | 1)                | Beijing     | 4.573 | 1)                    | Beijing       | 82.779 |
| 2)               | Redmond       | 274.693 | 2)                | Hong Kong   | 4.272 | 2)                    | Hong Kong     | 63.264 |
| 3)               | Hong Kong     | 267.166 | 3)                | Singapore   | 3.676 | 3)                    | Shanghai      | 57.495 |
| 4)               | Mountain View | 250.455 | 4)                | Shenzhen    | 3.399 | 4)                    | Wuhan         | 57.419 |
| 5)               | Singapore     | 237.563 | 5)                | Wuhan       | 3.332 | 5)                    | Nanjing       | 55.251 |
| 6)               | Berkeley      | 225.990 | 6)                | Shanghai    | 2.903 | 6)                    | Singapore     | 54.270 |
| 7)               | Stanford      | 223.877 | 7)                | Sydney      | 2.805 | 7)                    | Xi'an         | 48.936 |
| 8)               | Wuhan         | 220.923 | 8)                | Boston      | 2.663 | 8)                    | Sydney        | 47.068 |
| 9)               | Nanjing       | 208.613 | 9)                | Guangzhou   | 2.554 | 9)                    | Hefei         | 46.693 |
| 10)              | Xi'an         | 207.847 | 10)               | Xi'an       | 2.454 | 10)                   | Hangzhou      | 45.781 |
| 11)              | Shanghai      | 205.709 | 11)               | Harbin      | 2.388 | 11)                   | Chengdu       | 45.532 |
| 12)              | Oxford        | 200.175 | 12)               | Los Angeles | 2.352 | 12)                   | Tianjin       | 45.324 |
| 13)              | London        | 200.035 | 13)               | Nanjing     | 2.302 | 13)                   | Redmond       | 45.030 |
| 14)              | Pittsburgh    | 196.284 | 14)               | Hangzhou    | 2.290 | 14)                   | Cambridge     | 44.497 |
| 15)              | Munich        | 188.555 | 15)               | Redmond     | 2.268 | 15)                   | Guangzhou     | 42.976 |
| 16)              | Sydney        | 174.790 | 16)               | Tokyo       | 2.244 | 16)                   | London        | 42.605 |
| 17)              | Hangzhou      | 174.704 | 17)               | Hefei       | 2.236 | 17)                   | Harbin        | 41.721 |
| 18)              | Cambridge     | 173.723 | 18)               | Tianjin     | 2.229 | 18)                   | Changsha      | 41.347 |
| 19)              | Seoul         | 172.565 | 19)               | Washington  | 2.143 | 19)                   | Shenzhen      | 41.020 |
| 20)              | New York      | 170.066 | 20)               | Dalian      | 2.081 | 20)                   | Boston        | 38.976 |
| 21)              | Chengdu       | 168.153 | 21)               | San Jose    | 2.022 | 21)                   | Los Angeles   | 36.499 |
| 22)              | Harbin        | 164.829 | 22)               | Chapel Hill | 1.996 | 22)                   | Pittsburgh    | 36.234 |
| 23)              | Toronto       | 161.705 | 23)               | Urbana      | 1.967 | 23)                   | Dalian        | 35.270 |
| 24)              | Menlo Park    | 159.661 | 24)               | Chengdu     | 1.861 | 24)                   | Jinan         | 34.000 |
| 25)              | Seattle       | 159.477 | 25)               | Taipei      | 1.856 | 25)                   | Canberra      | 32.432 |
| 26)              | Los Angeles   | 154.639 | 26)               | Changsha    | 1.855 | 26)                   | Melbourne     | 32.380 |
| 27)              | Changsha      | 153.129 | 27)               | Armonk      | 1.774 | 27)                   | Jeddah        | 31.788 |
| 28)              | Boston        | 152.833 | 28)               | Waterloo    | 1.734 | 28)                   | Chongqing     | 31.441 |
| 29)              | Montreal      | 152.532 | 29)               | Chicago     | 1.733 | 29)                   | Tokyo         | 30.284 |
| 30)              | Forest Home   | 151.739 | 30)               | Pittsburgh  | 1.725 | 30)                   | Brisbane      | 30.167 |
| 31)              | Paris         | 150.073 | 31)               | Berkeley    | 1.712 | 31)                   | New York      | 30.019 |
| 32)              | Hefei         | 147.038 | 32)               | Ann Arbor   | 1.676 | 32)                   | Oxford        | 28.917 |
| 33)              | Zurich        | 146.493 | 33)               | Paris       | 1.673 | 33)                   | Munich        | 28.342 |
| 34)              | Dalian        | 141.453 | 34)               | Seattle     | 1.649 | 34)                   | Berkeley      | 27.740 |
| 35)              | Guangzhou     | 140.423 | 35)               | Munich      | 1.645 | 35)                   | Philadelphia  | 27.662 |
| 36)              | Urbana        | 138.763 | 36)               | Jinzhou     | 1.609 | 36)                   | Cambridge     | 26.223 |
| 37)              | Tehran        | 133.576 | 37)               | Cambridge   | 1.575 | 37)                   | Atlanta       | 25.791 |
| 38)              | San Diego     | 129.121 | 38)               | Bethesda    | 1.575 | 38)                   | Mountain View | 25.647 |
| 39)              | Chongqing     | 128.537 | 39)               | Stanford    | 1.521 | 39)                   | Paris         | 25.310 |
| 40)              | Rocquencourt  | 128.133 | 40)               | Canberra    | 1.517 | 40)                   | Chicago       | 25.022 |

Supplementary Table 6: City ranking of top cities according to **PageRank centrality** in the citation, migration, and collaboration networks. The color indicates whether the city is east (red) or west (blue).

| Citation network |               |           | Migration network |               |           | Collaboration network |               |           |
|------------------|---------------|-----------|-------------------|---------------|-----------|-----------------------|---------------|-----------|
| 1)               | Beijing       | 0.0100118 | 1)                | Beijing       | 0.0100062 | 1)                    | Beijing       | 0.0100084 |
| 2)               | Shanghai      | 0.0100026 | 2)                | Hong Kong     | 0.0100031 | 2)                    | London        | 0.0100029 |
| 3)               | Wuhan         | 0.0100023 | 3)                | Singapore     | 0.0100030 | 3)                    | Cambridge     | 0.0100022 |
| 4)               | Nanjing       | 0.0100022 | 4)                | Zurich        | 0.0100021 | 4)                    | Munich        | 0.0100021 |
| 5)               | Hong Kong     | 0.0100017 | 5)                | Sydney        | 0.0100017 | 5)                    | New York      | 0.0100017 |
| 6)               | Xi'an         | 0.0100016 | 6)                | Munich        | 0.0100017 | 6)                    | Shanghai      | 0.0100016 |
| 7)               | Singapore     | 0.0100016 | 7)                | Shanghai      | 0.0100016 | 7)                    | Paris         | 0.0100015 |
| 8)               | Seoul         | 0.0100015 | 8)                | Nanjing       | 0.0100013 | 8)                    | Nanjing       | 0.0100014 |
| 9)               | London        | 0.0100014 | 9)                | Seoul         | 0.0100013 | 9)                    | Hong Kong     | 0.0100014 |
| 10)              | Munich        | 0.0100010 | 10)               | Chengdu       | 0.0100012 | 10)                   | Singapore     | 0.0100013 |
| 11)              | Chengdu       | 0.0100010 | 11)               | Mountain View | 0.0100011 | 11)                   | Pittsburgh    | 0.0100011 |
| 12)              | Hangzhou      | 0.0100008 | 12)               | Boston        | 0.0100011 | 12)                   | Wuhan         | 0.0100011 |
| 13)              | Changsha      | 0.0100007 | 13)               | Xi'an         | 0.0100010 | 13)                   | Sydney        | 0.0100010 |
| 14)              | Paris         | 0.0100007 | 14)               | Toronto       | 0.0100010 | 14)                   | Boston        | 0.0100008 |
| 15)              | Cambridge     | 0.0100006 | 15)               | Seattle       | 0.0100010 | 15)                   | Washington    | 0.0100008 |
| 16)              | Sydney        | 0.0100006 | 16)               | Hangzhou      | 0.0100010 | 16)                   | Seoul         | 0.0100007 |
| 17)              | Pittsburgh    | 0.0100006 | 17)               | Wuhan         | 0.0100008 | 17)                   | Redmond       | 0.0100005 |
| 18)              | Hefei         | 0.0100005 | 18)               | Rocquencourt  | 0.0100007 | 18)                   | Xi'an         | 0.0100005 |
| 19)              | Harbin        | 0.0100005 | 19)               | London        | 0.0100007 | 19)                   | Los Angeles   | 0.0100004 |
| 20)              | Tehran        | 0.0100004 | 20)               | Pittsburgh    | 0.0100006 | 20)                   | Stanford      | 0.0100004 |
| 21)              | Tokyo         | 0.0100004 | 21)               | Taipei        | 0.0100005 | 21)                   | Mountain View | 0.0100004 |
| 22)              | Boston        | 0.0100003 | 22)               | Paris         | 0.0100004 | 22)                   | Chengdu       | 0.0100004 |
| 23)              | Tianjin       | 0.0100003 | 23)               | Redmond       | 0.0100004 | 23)                   | Montreal      | 0.0100004 |
| 24)              | Guangzhou     | 0.0100003 | 24)               | Madrid        | 0.0100004 | 24)                   | Melbourne     | 0.0100004 |
| 25)              | Los Angeles   | 0.0100002 | 25)               | Cambridge     | 0.0100003 | 25)                   | Toronto       | 0.0100003 |
| 26)              | New York      | 0.0100002 | 26)               | Washington    | 0.0100003 | 26)                   | Berkeley      | 0.0100003 |
| 27)              | Redmond       | 0.0100001 | 27)               | Stanford      | 0.0100003 | 27)                   | Seattle       | 0.0100003 |
| 28)              | Chongqing     | 0.0100000 | 28)               | New York      | 0.0100003 | 28)                   | Philadelphia  | 0.0100001 |
| 29)              | Dalian        | 0.0100000 | 29)               | Tokyo         | 0.0100003 | 29)                   | Armonk        | 0.0100001 |
| 30)              | Taipei        | 0.0100000 | 30)               | Shenzhen      | 0.0100003 | 30)                   | Hangzhou      | 0.0100000 |
| 31)              | Zurich        | 0.0100000 | 31)               | Cambridge     | 0.0100002 | 31)                   | Tehran        | 0.0100000 |
| 32)              | Stanford      | 0.0099999 | 32)               | Philadelphia  | 0.0100002 | 32)                   | Zurich        | 0.0100000 |
| 33)              | Toronto       | 0.0099999 | 33)               | Harbin        | 0.0100002 | 33)                   | Harbin        | 0.0100000 |
| 34)              | Montreal      | 0.0099999 | 34)               | Menlo Park    | 0.0100002 | 34)                   | Oxford        | 0.0100000 |
| 35)              | Daejeon       | 0.0099998 | 35)               | Melbourne     | 0.0100002 | 35)                   | Baltimore     | 0.0099999 |
| 36)              | Shenzhen      | 0.0099998 | 36)               | Jinan         | 0.0100000 | 36)                   | Urbana        | 0.0099999 |
| 37)              | Melbourne     | 0.0099998 | 37)               | Guangzhou     | 0.0100000 | 37)                   | Amsterdam     | 0.0099999 |
| 38)              | Jinan         | 0.0099998 | 38)               | Canberra      | 0.0099999 | 38)                   | Chicago       | 0.0099998 |
| 39)              | Philadelphia  | 0.0099998 | 39)               | Armonk        | 0.0099999 | 39)                   | Ann Arbor     | 0.0099998 |
| 40)              | Mountain View | 0.0099998 | 40)               | Chapel Hill   | 0.0099998 | 40)                   | Tianjin       | 0.0099998 |

Supplementary Table 7: City ranking according to **independent cascade-based influence** in the citation, migration, and collaboration networks. The color indicates whether the city is east (red) or west (blue).

| Citation network |       | Migration network |       | Collaboration network |       |
|------------------|-------|-------------------|-------|-----------------------|-------|
| 1) Beijing       | 3.092 | 1) Beijing        | 2.742 | 1) Beijing            | 5.993 |
| 2) Hong Kong     | 2.616 | 2) Hong Kong      | 2.023 | 2) Hong Kong          | 3.909 |
| 3) Redmond       | 2.565 | 3) Singapore      | 1.667 | 3) Shanghai           | 3.009 |
| 4) Mountain View | 2.175 | 4) Wuhan          | 1.299 | 4) Singapore          | 2.926 |
| 5) Stanford      | 1.804 | 5) Shanghai       | 1.126 | 5) Wuhan              | 2.841 |
| 6) Berkeley      | 1.793 | 6) Sydney         | 0.843 | 6) Nanjing            | 2.690 |
| 7) Singapore     | 1.748 | 7) Nanjing        | 0.794 | 7) Sydney             | 2.291 |
| 8) London        | 1.403 | 8) Xi'an          | 0.726 | 8) Cambridge          | 2.195 |
| 9) Pittsburgh    | 1.381 | 9) Shenzhen       | 0.705 | 9) London             | 2.139 |
| 10) Munich       | 1.357 | 10) Harbin        | 0.628 | 10) Hangzhou          | 1.908 |
| 11) Oxford       | 1.355 | 11) Hefei         | 0.491 | 11) Xi'an             | 1.788 |
| 12) Wuhan        | 1.293 | 12) Guangzhou     | 0.476 | 12) Redmond           | 1.786 |
| 13) Nanjing      | 1.264 | 13) Boston        | 0.476 | 13) Guangzhou         | 1.623 |
| 14) Cambridge    | 1.259 | 14) Munich        | 0.468 | 14) Chengdu           | 1.597 |
| 15) Shanghai     | 1.224 | 15) Pittsburgh    | 0.467 | 15) Pittsburgh        | 1.555 |
| 16) Xi'an        | 1.128 | 16) Tianjin       | 0.427 | 16) New York          | 1.535 |
| 17) New York     | 1.033 | 17) Paris         | 0.426 | 17) Hefei             | 1.479 |
| 18) Toronto      | 0.946 | 18) Redmond       | 0.411 | 18) Boston            | 1.472 |
| 19) Seoul        | 0.915 | 19) Chapel Hill   | 0.405 | 19) Shenzhen          | 1.464 |
| 20) Sydney       | 0.870 | 20) Tokyo         | 0.404 | 20) Los Angeles       | 1.409 |
| 21) Seattle      | 0.841 | 21) Taipei        | 0.398 | 21) Harbin            | 1.280 |
| 22) Los Angeles  | 0.802 | 22) Cambridge     | 0.378 | 22) Melbourne         | 1.260 |
| 23) Paris        | 0.800 | 23) Dalian        | 0.378 | 23) Changsha          | 1.213 |
| 24) Zurich       | 0.739 | 24) Hangzhou      | 0.370 | 24) Tianjin           | 1.165 |
| 25) Montreal     | 0.736 | 25) Washington    | 0.355 | 25) Munich            | 1.151 |
| 26) Menlo Park   | 0.728 | 26) Chengdu       | 0.351 | 26) Paris             | 1.035 |
| 27) Hangzhou     | 0.714 | 27) Los Angeles   | 0.344 | 27) Seoul             | 1.012 |
| 28) Forest Home  | 0.702 | 28) Canberra      | 0.326 | 28) Philadelphia      | 0.991 |
| 29) Chengdu      | 0.697 | 29) Seoul         | 0.308 | 29) Stanford          | 0.964 |
| 30) Harbin       | 0.656 | 30) London        | 0.305 | 30) Brisbane          | 0.915 |
| 31) Boston       | 0.627 | 31) Brisbane      | 0.286 | 31) Dalian            | 0.893 |
| 32) Changsha     | 0.569 | 32) Changsha      | 0.274 | 32) Seattle           | 0.799 |
| 33) Rocquencourt | 0.530 | 33) Armonk        | 0.262 | 33) Atlanta           | 0.792 |
| 34) Cambridge    | 0.500 | 34) Stanford      | 0.260 | 34) Tokyo             | 0.786 |
| 35) Urbana       | 0.498 | 35) Zurich        | 0.256 | 35) Berkeley          | 0.776 |
| 36) Chapel Hill  | 0.495 | 36) Philadelphia  | 0.240 | 36) Toronto           | 0.741 |
| 37) Tehran       | 0.478 | 37) Tehran        | 0.234 | 37) Canberra          | 0.710 |
| 38) Hefei        | 0.475 | 38) Ann Arbor     | 0.233 | 38) Mountain View     | 0.707 |
| 39) Dalian       | 0.470 | 39) Waterloo      | 0.227 | 39) Chongqing         | 0.699 |
| 40) Tokyo        | 0.459 | 40) Melbourne     | 0.227 | 40) Urbana            | 0.679 |

Supplementary Table 8: City ranking according to **linear threshold-based influence** in the citation, migration, and collaboration networks. The color indicates whether the city is east (red) or west (blue).

| Citation network |                      | Migration network |     | Collaboration network |        |     |               |        |
|------------------|----------------------|-------------------|-----|-----------------------|--------|-----|---------------|--------|
| 1)               | Beijing              | 41.889            | 1)  | Beijing               | 57.262 | 1)  | Beijing       | 54.064 |
| 2)               | Mountain View        | 36.319            | 2)  | Hong Kong             | 38.751 | 2)  | Cambridge     | 25.304 |
| 3)               | Redmond              | 35.302            | 3)  | Singapore             | 33.334 | 3)  | London        | 24.841 |
| 4)               | Stanford             | 32.073            | 4)  | Shanghai              | 25.074 | 4)  | Hong Kong     | 23.770 |
| 5)               | Berkeley             | 30.279            | 5)  | Wuhan                 | 22.822 | 5)  | Singapore     | 20.273 |
| 6)               | Hong Kong            | 26.967            | 6)  | Nanjing               | 19.313 | 6)  | New York      | 19.665 |
| 7)               | Cambridge            | 25.458            | 7)  | Sydney                | 17.561 | 7)  | Shanghai      | 19.652 |
| 8)               | Munich               | 25.009            | 8)  | Xi'an                 | 15.725 | 8)  | Sydney        | 17.431 |
| 9)               | Pittsburgh           | 24.233            | 9)  | Munich                | 14.071 | 9)  | Munich        | 16.645 |
| 10)              | London               | 23.663            | 10) | Paris                 | 13.408 | 10) | Wuhan         | 16.234 |
| 11)              | Oxford               | 21.586            | 11) | Shenzhen              | 12.470 | 11) | Nanjing       | 15.821 |
| 12)              | Singapore            | 19.076            | 12) | Harbin                | 12.153 | 12) | Pittsburgh    | 15.675 |
| 13)              | New York             | 18.659            | 13) | Pittsburgh            | 12.002 | 13) | Redmond       | 14.643 |
| 14)              | Toronto              | 17.637            | 14) | Boston                | 10.768 | 14) | Los Angeles   | 14.533 |
| 15)              | Seattle              | 14.771            | 15) | Guangzhou             | 10.167 | 15) | Paris         | 13.003 |
| 16)              | Paris                | 14.485            | 16) | Taipei                | 10.130 | 16) | Boston        | 12.900 |
| 17)              | Zurich               | 13.402            | 17) | Cambridge             | 10.000 | 17) | Stanford      | 11.929 |
| 18)              | Shanghai             | 13.272            | 18) | Tokyo                 | 9.844  | 18) | Seoul         | 11.928 |
| 19)              | Los Angeles          | 13.201            | 19) | Chengdu               | 9.796  | 19) | Philadelphia  | 11.165 |
| 20)              | Montreal             | 13.050            | 20) | Hefei                 | 9.285  | 20) | Hangzhou      | 11.108 |
| 21)              | Menlo Park           | 12.780            | 21) | Seoul                 | 9.259  | 21) | Melbourne     | 10.829 |
| 22)              | Seoul                | 12.580            | 22) | Redmond               | 9.184  | 22) | Xi'an         | 9.978  |
| 23)              | Nanjing              | 11.861            | 23) | Hangzhou              | 9.132  | 23) | Mountain View | 9.617  |
| 24)              | Wuhan                | 11.328            | 24) | Chapel Hill           | 8.788  | 24) | Seattle       | 9.591  |
| 25)              | Forest Home          | 11.117            | 25) | Tehran                | 8.614  | 25) | Berkeley      | 9.002  |
| 26)              | Sydney               | 10.615            | 26) | Washington            | 8.366  | 26) | Chengdu       | 8.751  |
| 27)              | Xi'an                | 10.428            | 27) | Zurich                | 8.182  | 27) | Washington    | 8.508  |
| 28)              | Cambridge            | 9.742             | 28) | London                | 7.857  | 28) | Montreal      | 8.488  |
| 29)              | Rocquencourt         | 9.386             | 29) | Philadelphia          | 7.631  | 29) | Baltimore     | 8.215  |
| 30)              | Urbana               | 8.578             | 30) | Ecublens              | 7.490  | 30) | Guangzhou     | 8.213  |
| 31)              | Boston               | 8.347             | 31) | Canberra              | 7.390  | 31) | Toronto       | 8.152  |
| 32)              | Princeton            | 8.064             | 32) | Dalian                | 7.074  | 32) | Urbana        | 7.687  |
| 33)              | Chapel Hill          | 7.884             | 33) | Tianjin               | 6.956  | 33) | Atlanta       | 7.427  |
| 34)              | Philadelphia         | 7.731             | 34) | Brisbane              | 6.850  | 34) | Houston       | 7.291  |
| 35)              | Baltimore            | 7.491             | 35) | Armonk                | 6.636  | 35) | Harbin        | 7.190  |
| 36)              | Freiburg im Breisgau | 7.468             | 36) | Los Angeles           | 6.492  | 36) | Tokyo         | 7.046  |
| 37)              | Hangzhou             | 7.302             | 37) | Toronto               | 6.112  | 37) | Brisbane      | 6.977  |
| 38)              | Santa Clara          | 7.194             | 38) | Ann Arbor             | 6.104  | 38) | Hefei         | 6.925  |
| 39)              | Armonk               | 7.050             | 39) | Waterloo              | 5.995  | 39) | Zurich        | 6.827  |
| 40)              | Tokyo                | 6.866             | 40) | Stanford              | 5.939  | 40) | Oxford        | 6.800  |





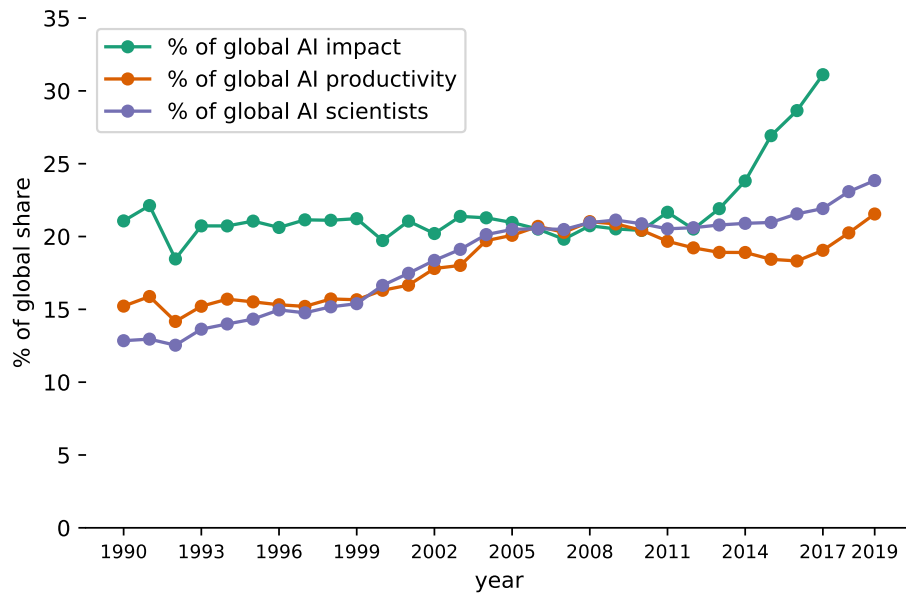

Supplementary Figure 2: **Top city's share of global AI research.** For each year, the figure depicts the top 20 cities' share of global AI impact, global AI productivity, and global AI scientists.

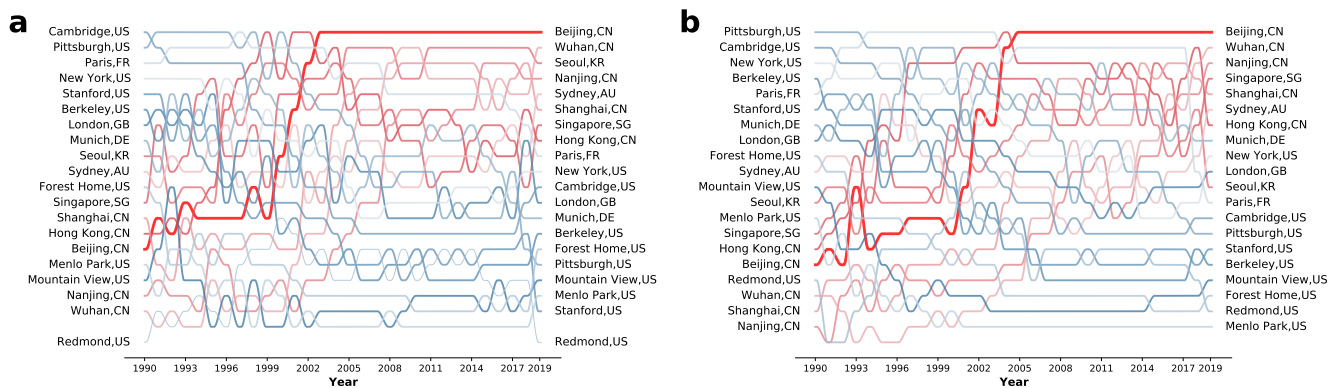

Supplementary Figure 3: (a) The most disruptive cities over time, (b) The most developmental cities over time.

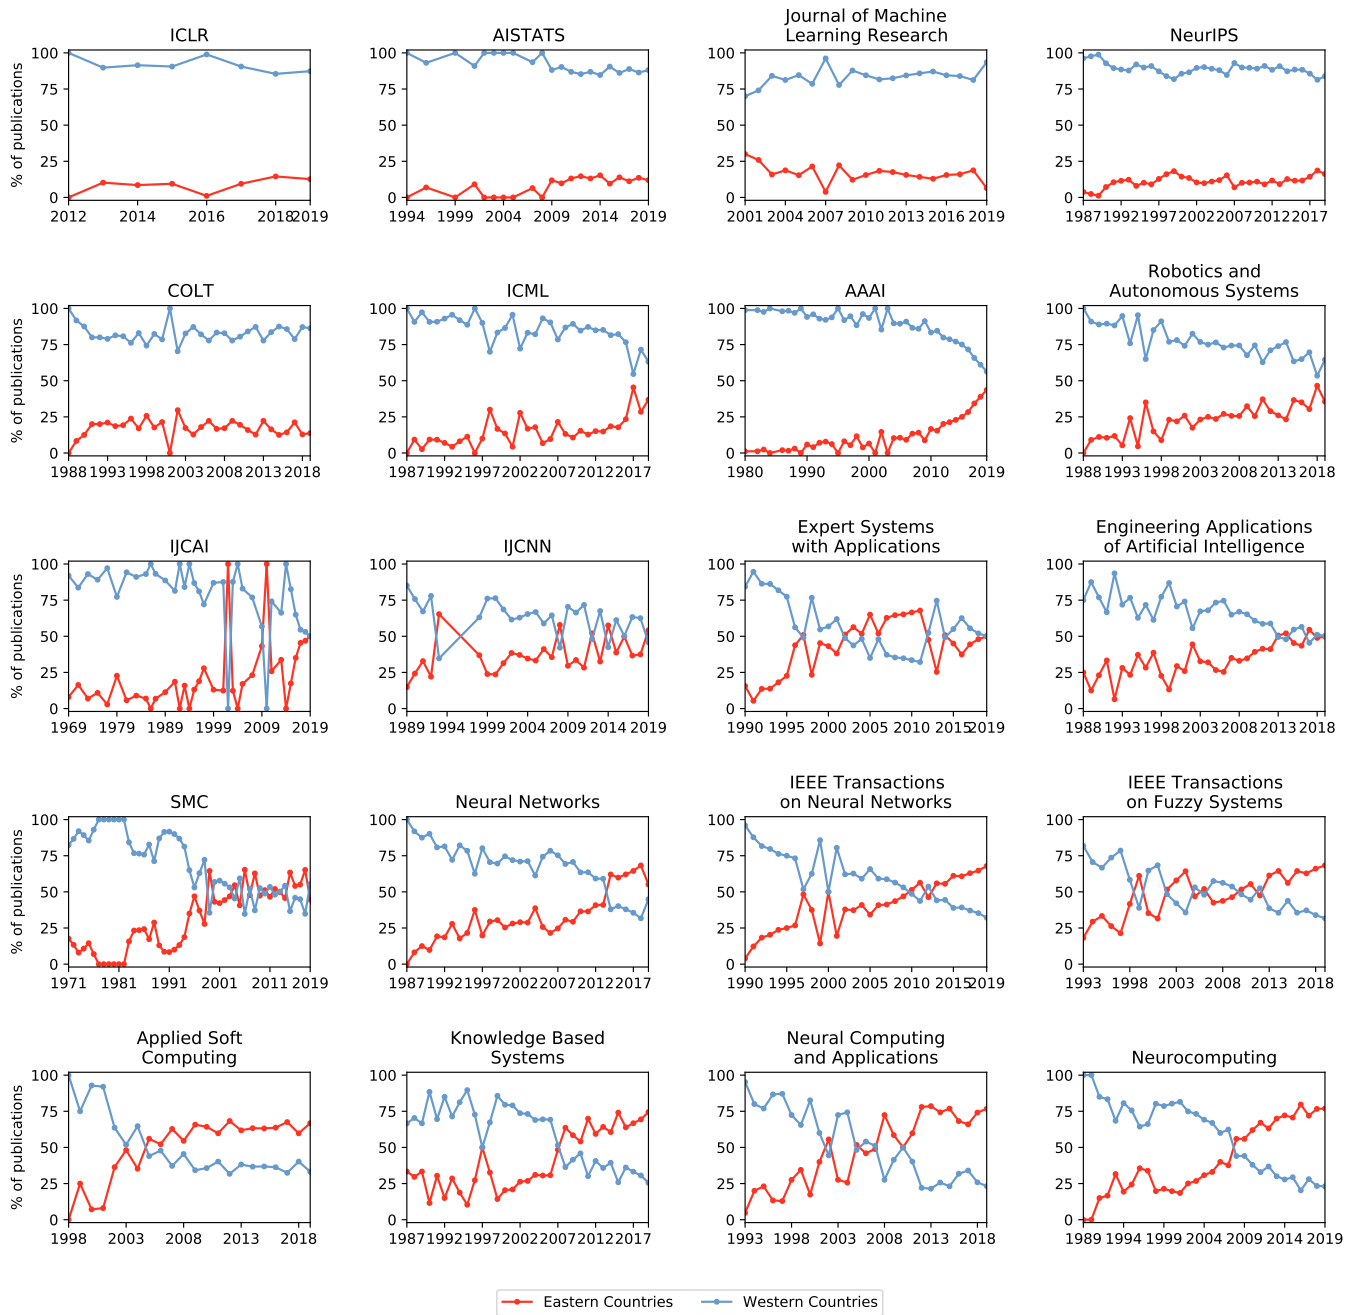

Supplementary Figure 4: The top 20 AI venues, ranked from left to right and top to bottom according to the share of papers produced by Western cities out of all papers published in the venue during the last five years. The first subfigure shows the venue where the share of Western cities is the largest, while the last subfigure shows the venue where the share of Eastern cities is the largest.

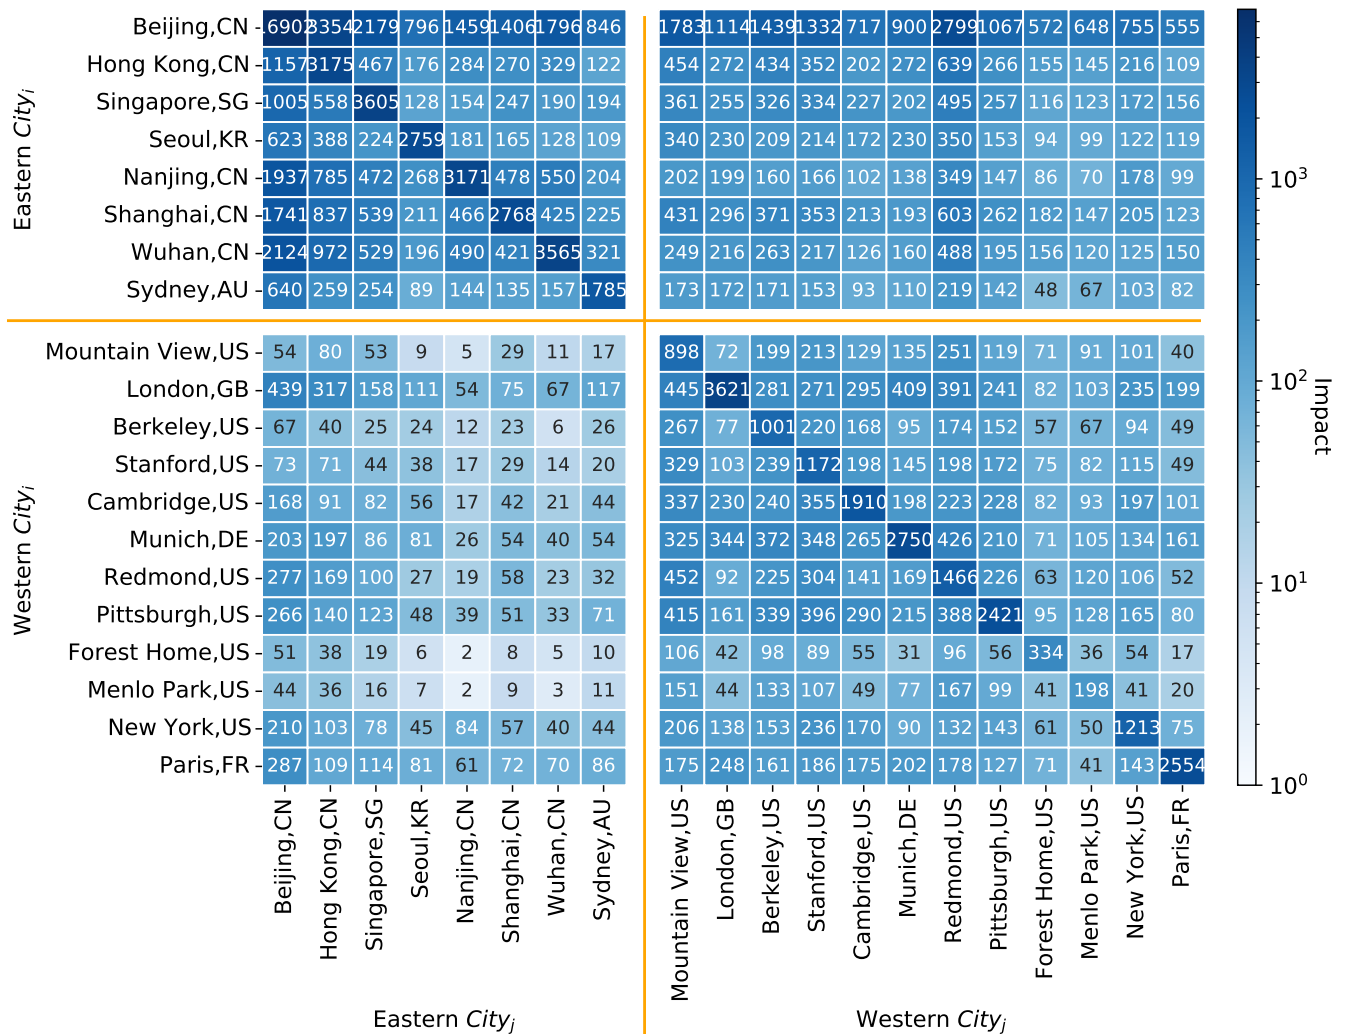

Supplementary Figure 5: Figure 2a but with a logarithm scale.

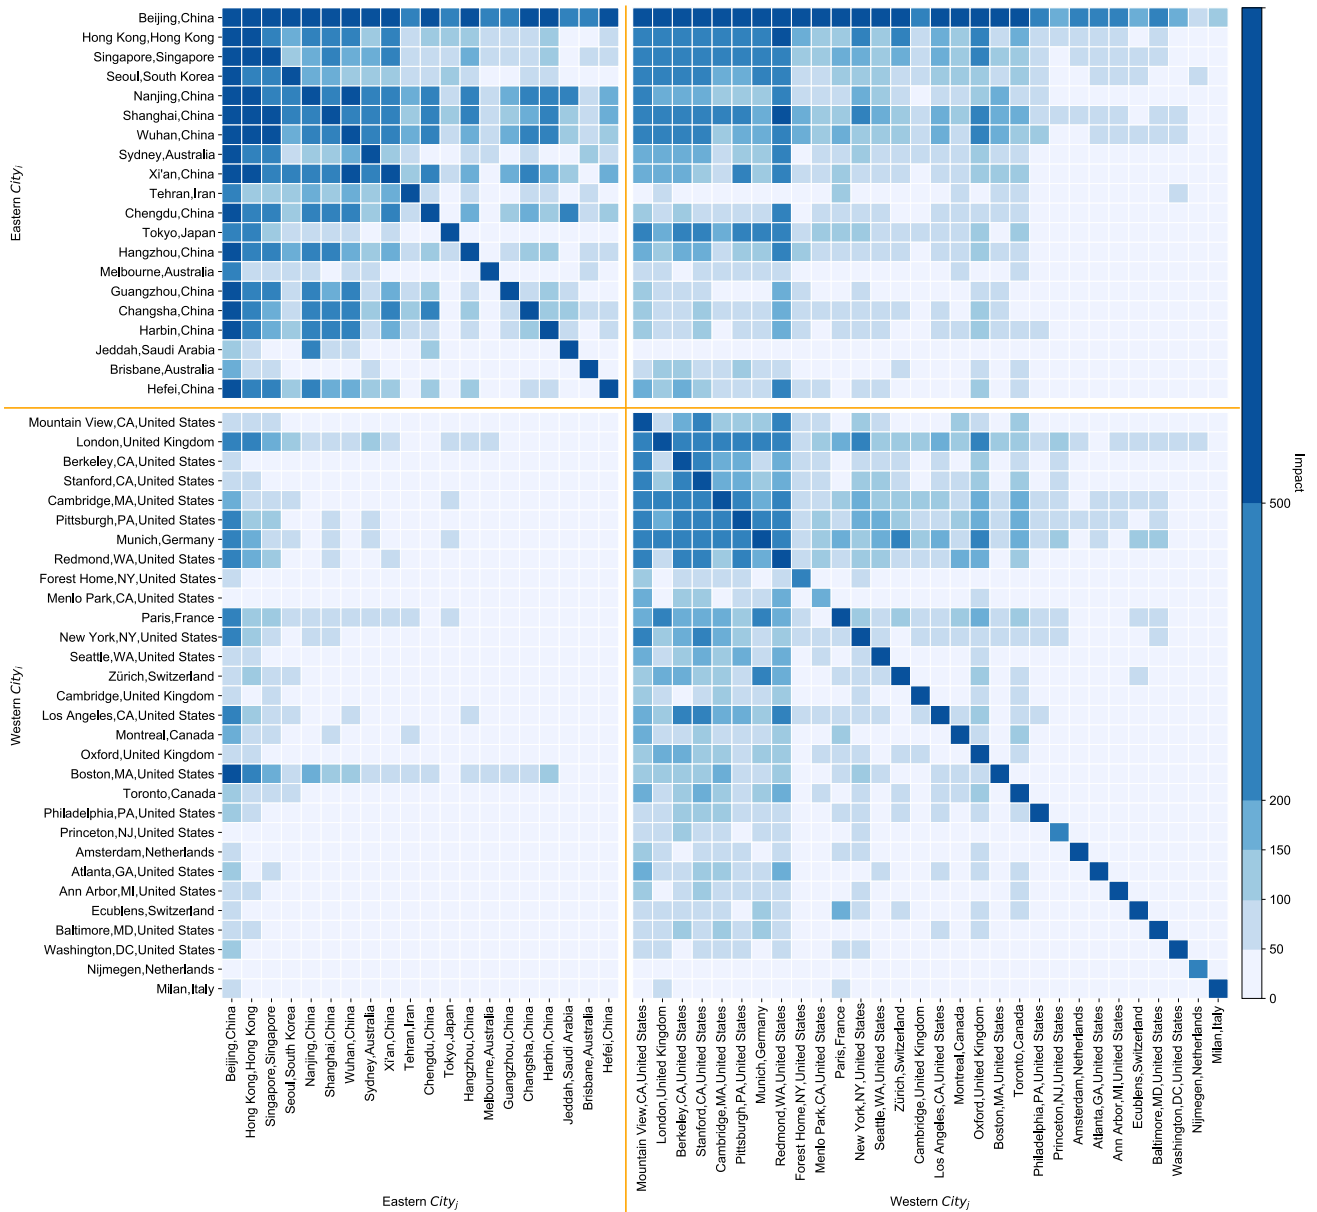

Supplementary Figure 6: **Pair-wise impact of 50 cities in terms of AI impact.** Similar to Figure 2a, except that we now consider the top 50 cities instead of the top 20.

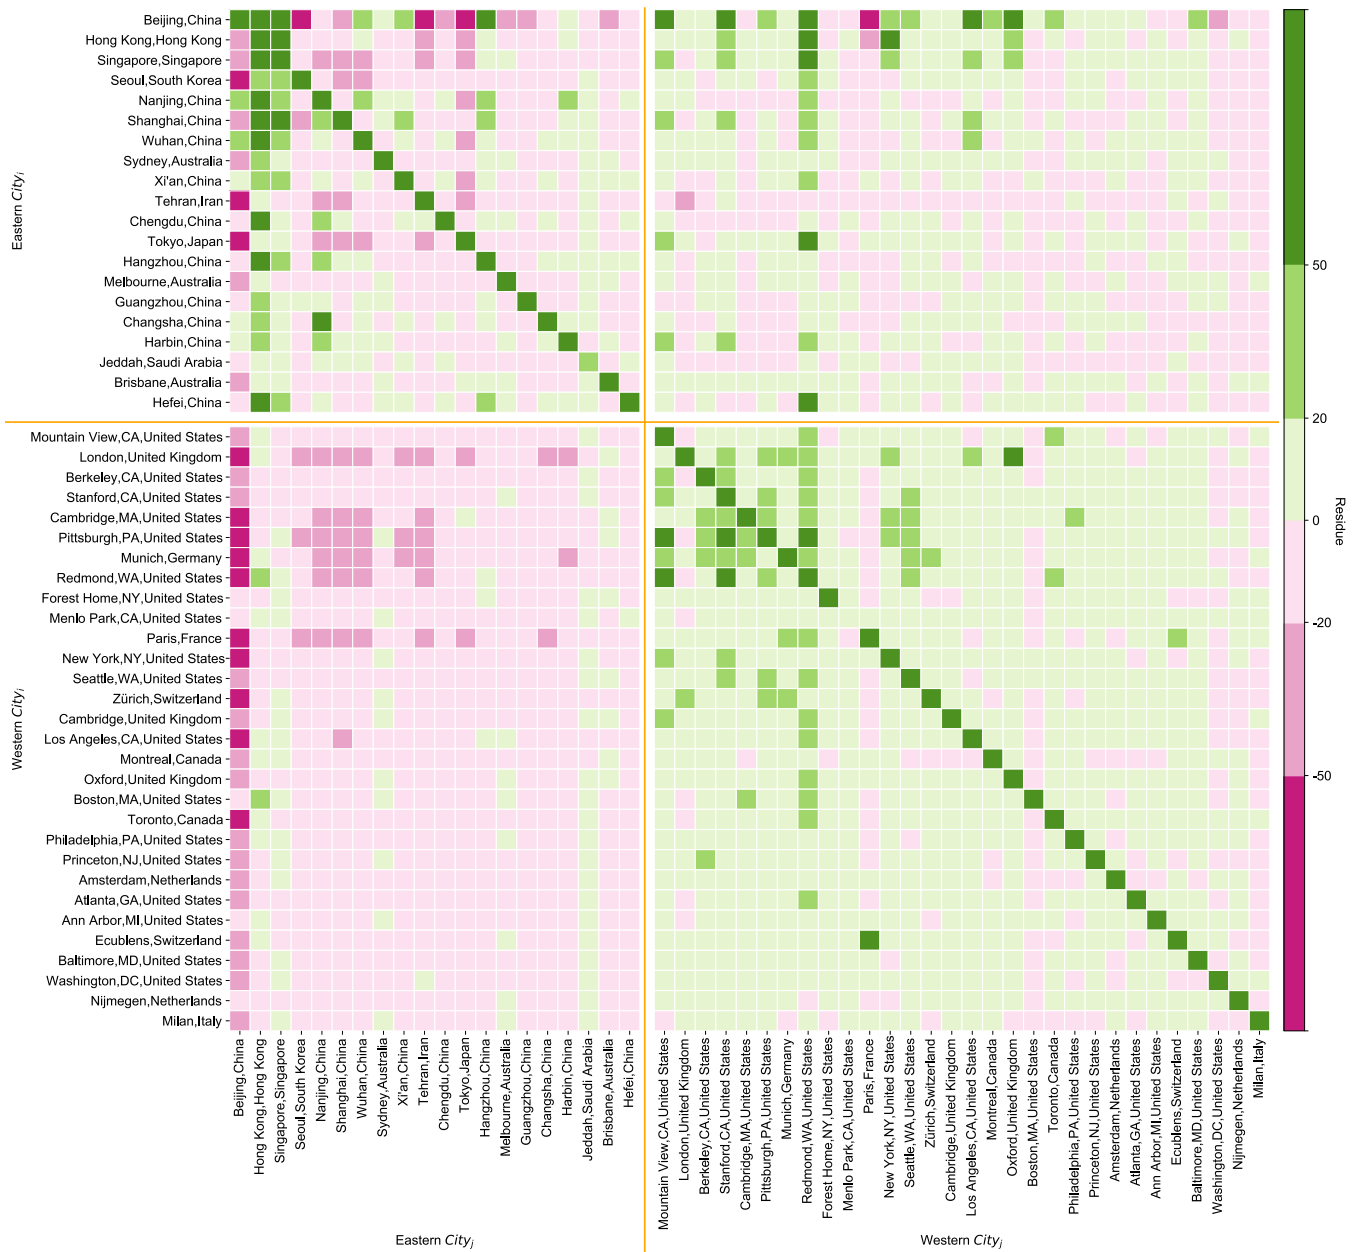

Supplementary Figure 7: **Pair-wise impact of 50 cities in terms of AI over-impact.** Similar to Figure 2b, except that we now consider the top 50 cities instead of the top 20.

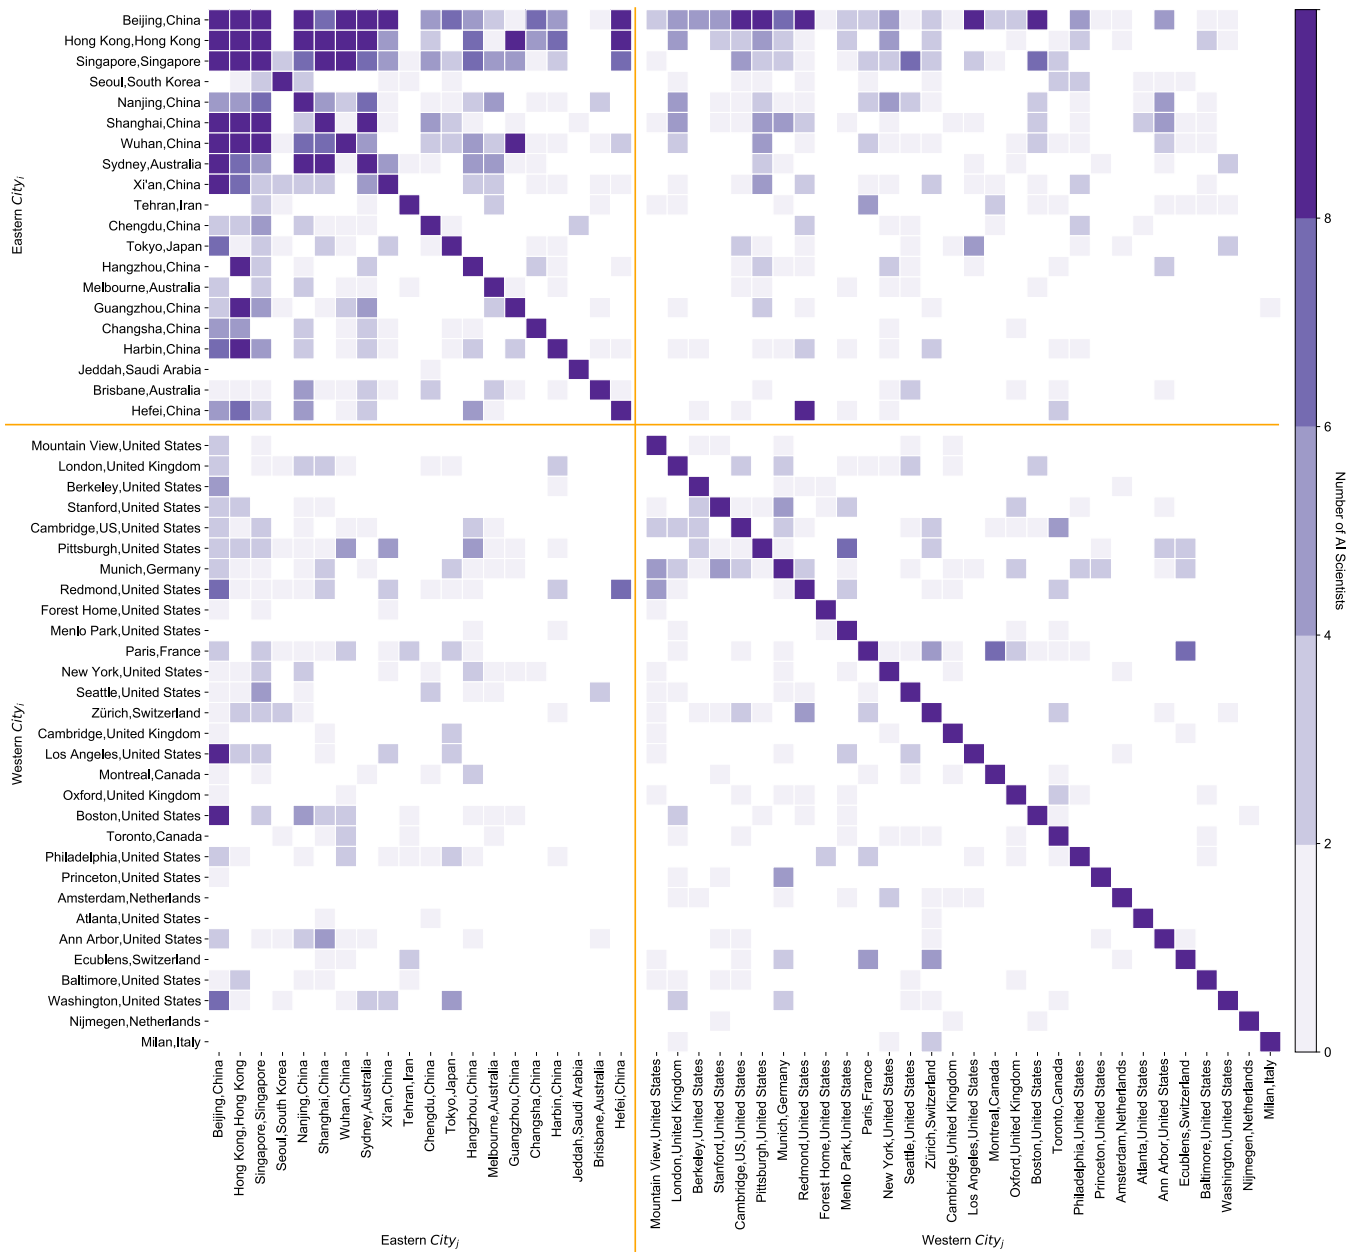

Supplementary Figure 8: Migration between top 50 cities in terms of AI impact 2017. Similar to Figure 2c, except that we now consider the top 50 cities instead of the top 20.

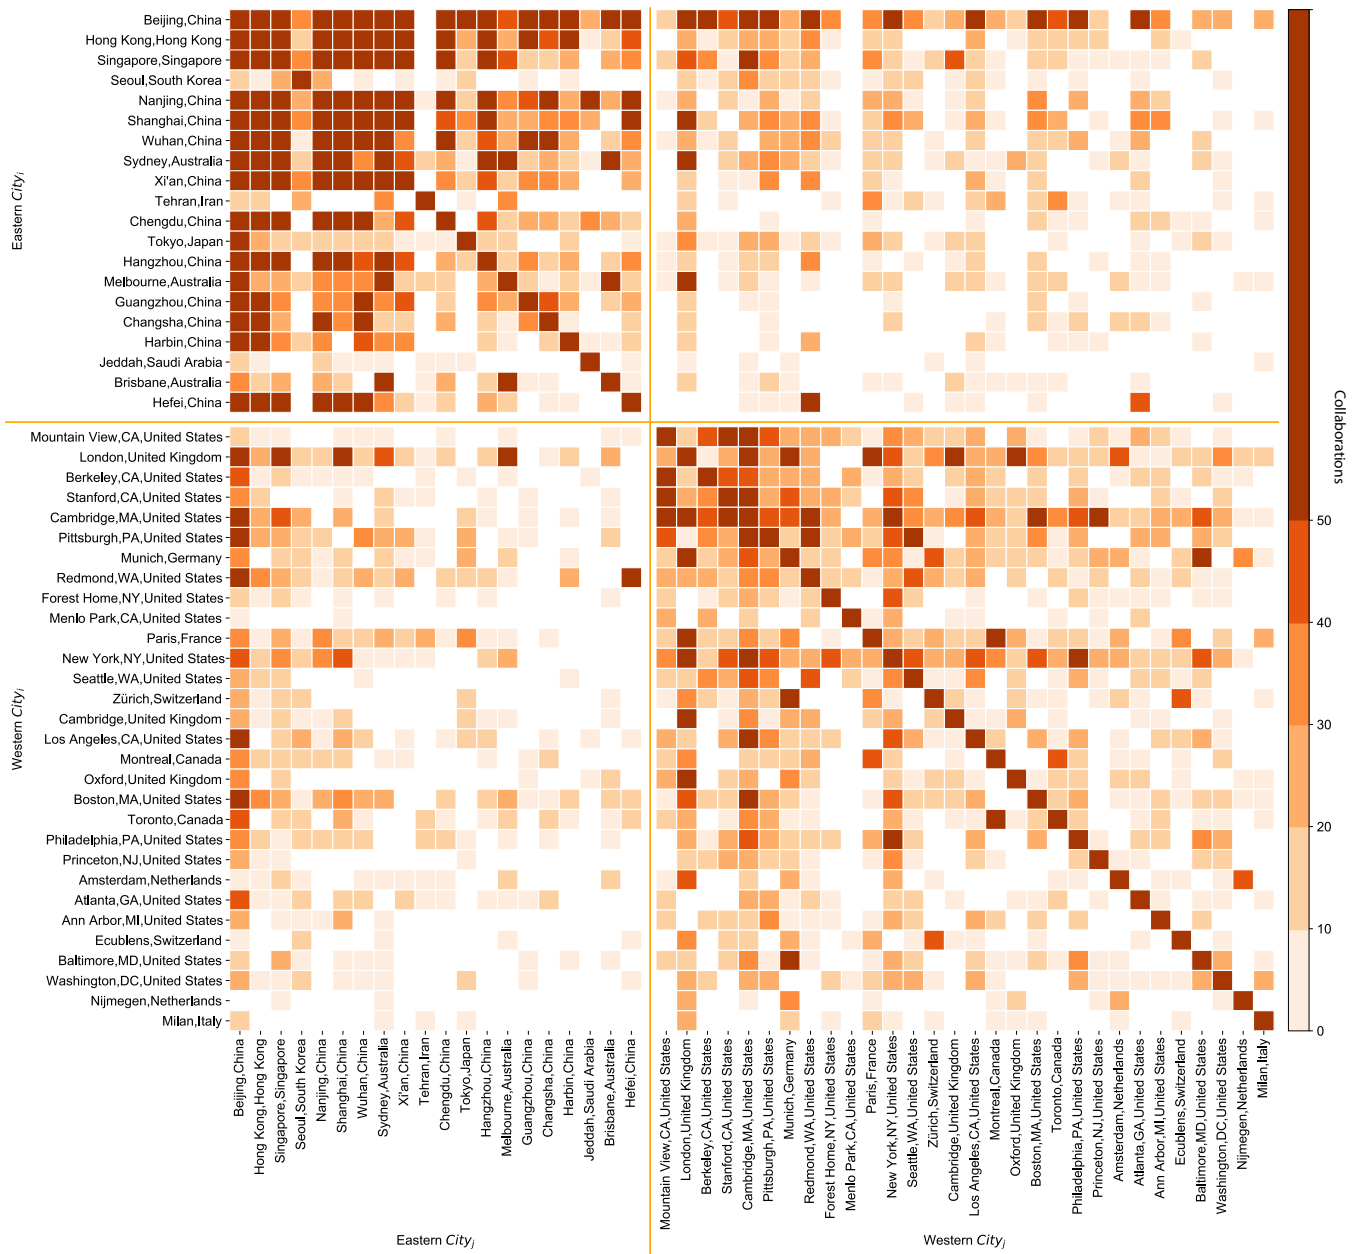

Supplementary Figure 9: **Collaboration between top 50 cities in terms of AI impact 2017.** Similar to Figure 2d, except that we now consider the top 50 cities instead of the top 20.



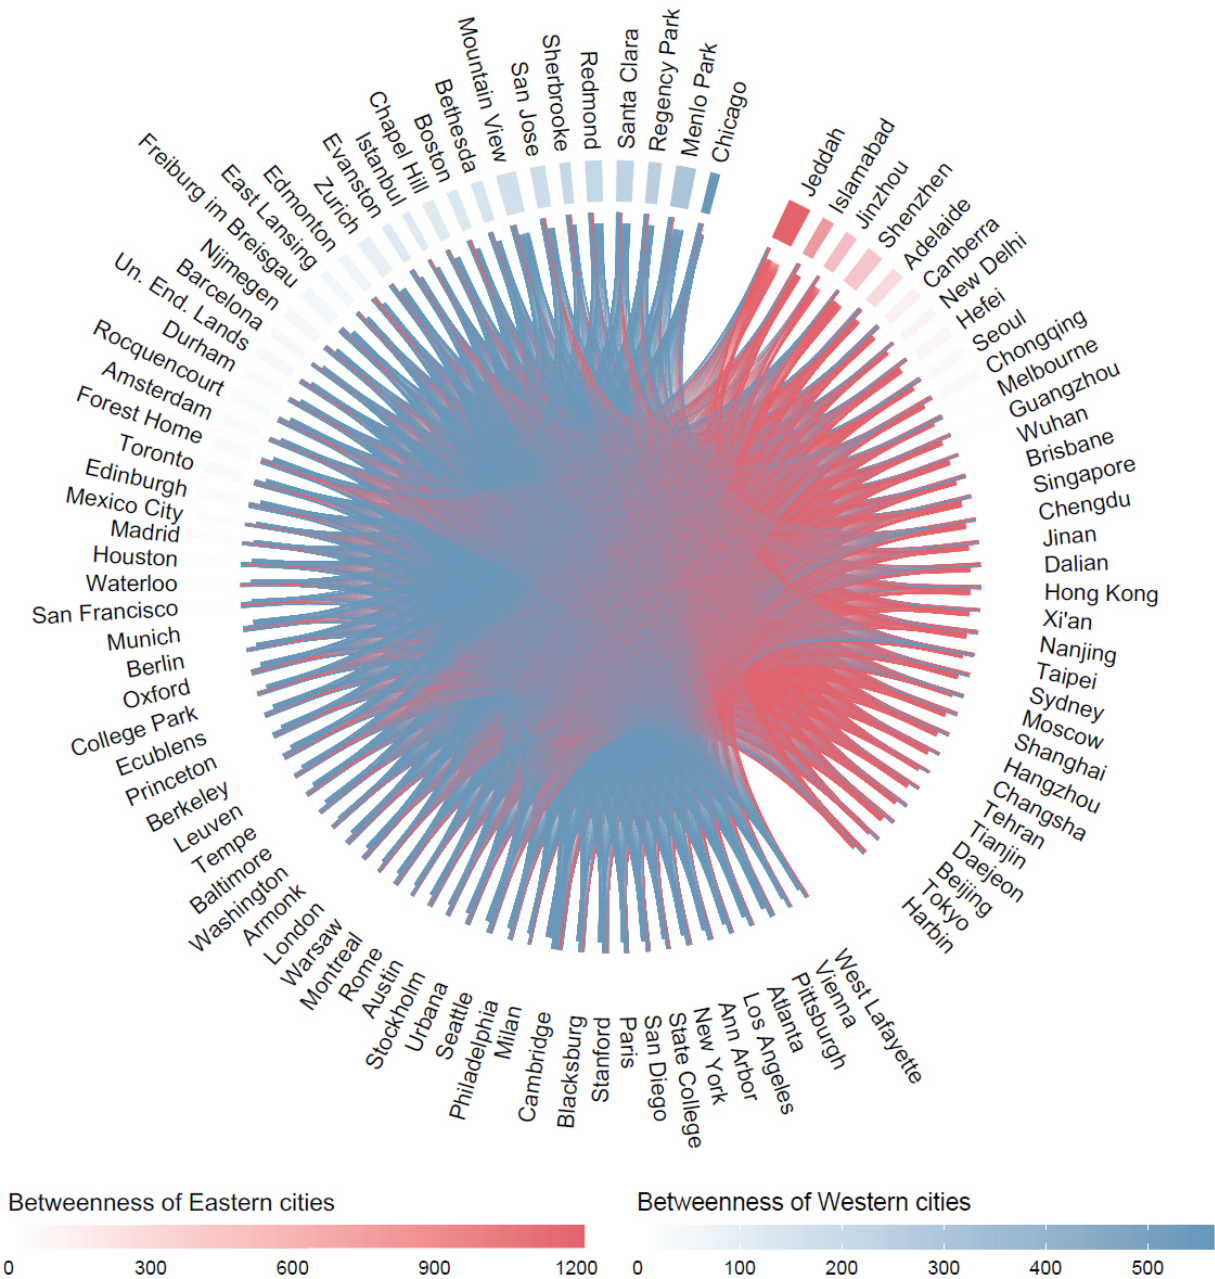

Supplementary Figure 10: **Betweenness centrality of different cities in the networks of normalized impact.** The chord diagram represents a normalized citation network, where the weight of the edge from city  $i$  to city  $j$  represents: (share of citations to  $j$ 's AI papers that came from  $i$ 's AI papers) divided by ( $j$ 's share of global AI papers). Colors indicate whether the city is in the East (red) or the West (blue). For each city, the size of the corresponding arc (the portion of the outer ring) reflects the number of edges adjacent to the city, while the arc's color intensity reflects the city's betweenness. Cities are grouped into Eastern (right) and Western (left), and are sorted within each group according to betweenness. As for edges in the inner circle, the color indicates whether the edge points to a city in the East (red) or the West (blue), while the thickness indicates the edge's weight.



## References

- [1] Tinbergen, J. Shaping the world economy; suggestions for an international economic policy (1962).
- [2] Anderson, J. E. The gravity model. *Annu. Rev. Econ.* **3**, 133–160 (2011).
- [3] Chaney, T. The gravity equation in international trade: An explanation. *Journal of Political Economy* **126**, 150–177 (2018).
- [4] Santos-Silva, J. & Tenreyro, S. The log of gravity. *The Review of Economics and statistics* **88**, 641–658 (2006).
- [5] Anderson, J. E. & Van Wincoop, E. Gravity with gravitas: A solution to the border puzzle. *American economic review* **93**, 170–192 (2003).
- [6] Mayer, T. & Zignago, S. Notes on cepii’s distances measures: The geodist database (2011).
- [7] Shaw, M. E. Group structure and the behavior of individuals in small groups. *The Journal of Psychology* **38**, 139–149 (1954).
- [8] Beauchamp, M. A. An improved index of centrality. *Behavioral Science* **10**, 161–163 (1965).
- [9] Page, L., Brin, S., Motwani, R. & Winograd, T. The pagerank citation ranking: Bringing order to the web. Tech. Rep., Stanford InfoLab (1999).
- [10] Goldenberg, J., Libai, B. & Muller, E. Using complex systems analysis to advance marketing theory development: Modeling heterogeneity effects on new product growth through stochastic cellular automata. *Academy of Marketing Science Review* **9**, 1–18 (2001).
- [11] Kempe, D., Kleinberg, J. & Tardos, É. Maximizing the spread of influence through a social network. In *Proceedings of the ninth ACM SIGKDD international conference on Knowledge discovery and data mining*, 137–146 (ACM, 2003).
